# Supplementary material for: Disease Progression of Hypertrophic Cardiomyopathy: Modeling Using Machine Learning
Source: PubMed Central journal article supplement (PMC8851344; doi:10.2196/30483), 2022-02-02
Supplement: medinform_v10i2e30483_app2.pdf [file medinform_v10i2e30483_app2.pdf]

|                               |       |       |       |       |       |       |       |       |       |
|-------------------------------|-------|-------|-------|-------|-------|-------|-------|-------|-------|
| Ech_Echo_Pvw                  | 13.0  | 10.0  |       | 12.0  | 14.0  | 11.0  | 11.0  | 12.0  | 10.0  |
| Ech_Echo_LA                   | 43.0  | 36.0  | 44.0  | 44.0  | 43.0  | 34.0  | 37.0  |       | 42.0  |
| Ech_Echo_LA_Vol               | 60.0  | 96.0  | 75.0  | 88.0  | 89.0  | 85.0  | 89.0  | 78.0  | 75.0  |
| Ech_Echo_LVEF                 | 62.0  | 66.0  | 60.0  | 67.0  | 68.0  | 83.0  | 75.0  | 67.0  | 63.0  |
| Ech_Echo_Max_LVT              | 26.0  | 22.0  | 28.0  | 15.0  | 15.0  | 12.0  | 13.0  | 13.0  | 13.0  |
| Ech_Echo_LVIDd                | 42.0  | 44.0  | 49.0  | 49.0  | 49.0  | 55.0  | 54.0  | 57.0  | 52.0  |
| Ech_Echo_LVIDs                | 21.0  |       | 32.0  | 28.0  | 20.0  | 24.0  | 26.0  | 24.0  | 27.0  |
| Ech_Mitral_Regurg_Grade       |       |       |       |       | 2.0   | 1.0   |       |       |       |
| Ech_Tricuspid_Regurg_Grade    |       |       |       |       |       |       |       |       |       |
| Ech_doppler_LVOTO_Provocation | 5.0   |       |       |       |       |       |       |       |       |
| Ech_doppler_LVOTO_Rest        | 5.0   | 50.0  | 22.0  | 6.0   | 13.0  |       | 60.0  |       | 53.0  |
| Ech_doppler_Mitral_Valve_E_DT |       | 320.0 | 190.0 | 180.0 | 196.0 | 205.0 | 204.0 | 188.0 |       |
| CRE_Value                     |       |       |       |       |       |       |       |       |       |
| HGB_Value                     |       |       |       |       |       |       |       |       |       |
| NTBNP_Value                   |       |       |       |       |       |       |       | 187.4 | 187.4 |
| CMR_CMR_LV_Mass               | 236.0 | 236.0 | 236.0 | 239.0 | 239.0 | 239.0 | 239.0 |       |       |
| CMR_GD_Del_Enhance            | 1.0   | 1.0   | 1.0   | 0.0   | 0.0   | 0.0   | 0.0   | 0.0   | 0.0   |
| CMR_CMR_LVSV                  | 93.0  | 93.0  | 93.0  | 102.2 | 102.2 | 102.2 | 102.2 |       |       |
| CMR_CMR_RVSV                  |       |       |       |       |       |       |       |       |       |

Events:

| Diagnosis_Date | Diagnosis |
|----------------|-----------|
| 24.09.2017     | MYECTOMY  |

Medications:

| Med_Name | Med_Start_Date | Med_Stop_Date |
|----------|----------------|---------------|
| NADOLOLO | 09.08.2017     | 04.09.2018    |



|                         |                          |                          |                          |                          |                          |                          |                          |
|-------------------------|--------------------------|--------------------------|--------------------------|--------------------------|--------------------------|--------------------------|--------------------------|
| Target parameter: LVIDs | <input type="checkbox"/> | <input type="checkbox"/> | <input type="checkbox"/> | <input type="checkbox"/> | <input type="checkbox"/> | <input type="checkbox"/> | <input type="checkbox"/> |
| Target parameter: NYHA  | <input type="checkbox"/> | <input type="checkbox"/> | <input type="checkbox"/> | <input type="checkbox"/> | <input type="checkbox"/> | <input type="checkbox"/> | <input type="checkbox"/> |

### Task #3 - status in 10 years

Based on the current clinical picture and past data (in the previous section), predict the patients' status: in which of the **three branches (stable, adverse remodeling, overt dysfunction)** will each patient be in 10 years.

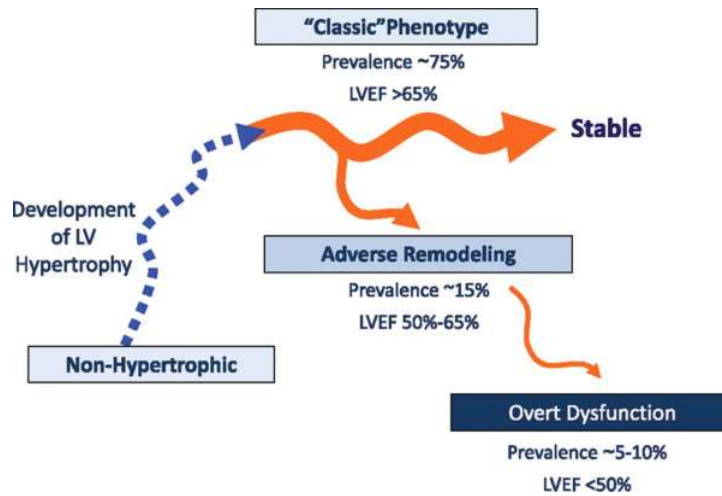

- Stable
- Adverse remodeling
- Overt dysfunction

## Task #4 - prediction explanation

---

Determine whether clinical parameters in question increase or decrease the predicted value for target parameters (LA, LVEF, LVIDd, LVIDs, NYHA, LA\_Vol) in 10 years after the current state.

---

1. The current value of the clinical parameter *Ech\_Echo\_LA* will cause a decrease of the predicted value of the target parameter *LA*.

- True
  - False
- 

2. The current value of the clinical parameter *ECG\_QRS* will cause an increase of the predicted value of the target parameter *LVEF*.

- True
  - False
- 

3. The current value of the clinical parameter *Ech\_Echo\_LVIDd* will cause an increase of the predicted value of the target parameter *LVIDs*.

- True
  - False
- 

4. The current value of the clinical parameter *Age* will cause an increase of the predicted value of the target parameter *NYHA*.

- True
- False

## Optional supplement - Full patient data

Measurements:

| Encounter_Date | Age       | Gender | Weight | Height | BMI  | BSA  | Primary_Diagnosis | NYHA | FHx_DCM | FHx_HCM | FHx_SCD | FHx_CAD | Diagnosis_DIABETES | Dia |
|----------------|-----------|--------|--------|--------|------|------|-------------------|------|---------|---------|---------|---------|--------------------|-----|
| 03.07.2017     | 31.390104 | MALE   | 74.0   | 170.0  | 25.6 | 1.87 | HCM               | 3.0  | 0.0     | 0.0     | 0.0     | 0.0     | 0.0                | 0.0 |
| 08.08.2017     | 31.488668 | MALE   | 74.0   | 170.0  | 25.6 | 1.87 | HCM               | 3.0  | 0.0     | 0.0     | 0.0     | 0.0     | 0.0                | 0.0 |
| 02.10.2017     | 31.639253 | MALE   | 74.0   | 170.0  | 25.6 | 1.87 | HCM               | 2.0  | 0.0     | 0.0     | 0.0     | 0.0     | 0.0                | 0.0 |
| 19.10.2017     | 31.685798 | MALE   | 74.0   | 170.0  | 25.6 | 1.87 | HCM               | 1.0  | 0.0     | 0.0     | 0.0     | 0.0     | 0.0                | 0.0 |
| 28.12.2017     | 31.877451 | MALE   | 73.0   | 170.0  | 25.3 | 1.86 | HCM               | 1.0  | 0.0     | 0.0     | 0.0     | 0.0     | 0.0                | 0.0 |
| 30.08.2018     | 32.548238 | MALE   | 73.0   | 170.0  | 25.3 | 1.86 | HCM               |      | 0.0     | 0.0     | 0.0     | 0.0     | 0.0                | 0.0 |
| 27.12.2018     | 32.874049 | MALE   | 73.0   | 170.0  | 25.3 | 1.86 | HCM               | 1.0  | 0.0     | 0.0     | 0.0     | 0.0     | 0.0                | 0.0 |
| 08.01.2020     | 33.906240 | MALE   | 75.0   | 170.0  | 26.0 | 1.88 | HCM               | 1.0  | 0.0     | 0.0     | 0.0     | 0.0     | 0.0                | 0.0 |
| 20.07.2020     | 34.437394 | MALE   | 87.0   | 170.0  | 30.1 | 2.03 | HCM               | 2.0  | 0.0     | 0.0     | 0.0     | 0.0     | 0.0                | 0.0 |

Events:

| Diagnosis_Date | Diagnosis |
|----------------|-----------|
| 24.09.2017     | MYECTOMY  |

Medications:

| Med_Name | Med_Start_Date | Med_Stop_Date |
|----------|----------------|---------------|
|----------|----------------|---------------|

|          |            |            |
|----------|------------|------------|
| NADOLOLO | 09.08.2017 | 04.09.2018 |
|----------|------------|------------|

---

[Previous page](#)

[Next page](#)

---

[TKA - web surveys](#)  
[Survey without cookies](#)  
[Privacy policy](#)
